# Supplementary material for: Cr,Yb-codoped Ca2LaHf2Al3O12garnet phosphor: electronic structure, broadband NIR emission and energy transfer properties
Source: Royal Society of Chemistry journal article supplement (doi:10.1039/d0dt03840g), 2020-12-08
Supplement: d0dt03840g1.pdf [file d0dt03840g1.pdf]

## Supporting Information

### **Cr,Yb-Codoped $\text{Ca}_2\text{LaHf}_2\text{Al}_3\text{O}_{12}$ Garnet Phosphor: Electronic Structure, Broadband NIR Emission and Energy Transfer Properties**

Dayu Huang,<sup>a,b</sup> Qiuyun Ouyang<sup>a,\*</sup> Hui Xiao,<sup>b</sup> Bo Wang,<sup>c,\*</sup> Hongzhou Lian,<sup>b,\*</sup>  
Qingguang Zeng<sup>c</sup> and Jun Lin<sup>b,c</sup>

<sup>a</sup>Key Laboratory of In-Fiber Integrated Optics, Ministry Education of China, and  
College of Physics and Optoelectronic Engineering, Harbin Engineering University,  
Harbin 150001, China

<sup>b</sup>State Key Laboratory of Rare Earth Resource Utilization, Changchun Institute of  
Applied Chemistry, Chinese Academy of Sciences, Changchun 130022, P. R. China

<sup>c</sup>School of Applied Physics and Materials, Wuyi University, Jiangmen, Guangdong  
529020, P.R. China

**Table S1.** Quantities of materials used for  $\text{Ca}_2\text{LaHf}_2\text{Al}_3\text{O}_{12}:\text{xCr}^{3+}$  ( $x = 0.003\text{-}0.05$ )

| $x$ (mmol) | $\text{CaCO}_3$ (g) | $\text{La}_2\text{O}_3$ (g) | $\text{HfO}_2$ (g) | $\text{Al}_2\text{O}_3$ (g) | $\text{CrO}_2$ (g) |
|------------|---------------------|-----------------------------|--------------------|-----------------------------|--------------------|
| 0.003      | 0.2                 | 0.1629                      | 0.4197             | 0.1529                      | 0.0002             |
| 0.004      | 0.2                 | 0.1629                      | 0.4192             | 0.1529                      | 0.0003             |
| 0.005      | 0.2                 | 0.1629                      | 0.4188             | 0.1529                      | 0.0004             |
| 0.01       | 0.2                 | 0.1629                      | 0.4168             | 0.1529                      | 0.0008             |
| 0.015      | 0.2                 | 0.1629                      | 0.4147             | 0.1529                      | 0.0011             |
| 0.02       | 0.2                 | 0.1629                      | 0.4127             | 0.1529                      | 0.0015             |
| 0.03       | 0.2                 | 0.1629                      | 0.4084             | 0.1529                      | 0.0022             |
| 0.04       | 0.2                 | 0.1629                      | 0.4041             | 0.1529                      | 0.003              |
| 0.05       | 0.2                 | 0.1629                      | 0.3999             | 0.1529                      | 0.0037             |

samples.

**Table S2.** Quantities of materials used for  $\text{Ca}_2\text{LaHf}_2\text{Al}_3\text{O}_{12}:\text{0.01Cr}^{3+},\text{yYb}^{3+}$  ( $y = 0.003\text{-}0.05$ ) samples.

| $x$ (mmol) | $\text{CaCO}_3$<br>(g) | $\text{La}_2\text{O}_3$ (g) | $\text{HfO}_2$ (g) | $\text{Al}_2\text{O}_3$ (g) | $\text{CrO}_2$ (g) | $\text{Yb}_2\text{O}_3$ (g) |
|------------|------------------------|-----------------------------|--------------------|-----------------------------|--------------------|-----------------------------|
| 0.003      | 0.1996                 | 0.1629                      | 0.4168             | 0.1529                      | 0.0022             | 0.0006                      |
| 0.004      | 0.1994                 | 0.1629                      | 0.4168             | 0.1529                      | 0.0022             | 0.0008                      |
| 0.005      | 0.1992                 | 0.1629                      | 0.4168             | 0.1529                      | 0.0022             | 0.001                       |
| 0.01       | 0.1982                 | 0.1629                      | 0.4168             | 0.1529                      | 0.0022             | 0.002                       |
| 0.015      | 0.1972                 | 0.1629                      | 0.4168             | 0.1529                      | 0.0022             | 0.003                       |
| 0.02       | 0.1962                 | 0.1629                      | 0.4168             | 0.1529                      | 0.0022             | 0.004                       |
| 0.03       | 0.1942                 | 0.1629                      | 0.4168             | 0.1529                      | 0.0022             | 0.006                       |
| 0.04       | 0.1922                 | 0.1629                      | 0.4168             | 0.1529                      | 0.0022             | 0.008                       |
| 0.05       | 0.1902                 | 0.1629                      | 0.4168             | 0.1529                      | 0.0022             | 0.01                        |

**Table S3.** Crystallographic data for  $\text{Ca}_2\text{LaHf}_2\text{Al}_3\text{O}_{12}$  and  $\text{Ca}_2\text{GdZr}_2\text{Al}_3\text{O}_{12}$ .

| Formula             | $\text{Ca}_2\text{LaHf}_2\text{Al}_3\text{O}_{12}$ | $\text{Ca}_2\text{GdZr}_2\text{Al}_3\text{O}_{12}$ |
|---------------------|----------------------------------------------------|----------------------------------------------------|
| symmetry            | Cubic                                              | Cubic                                              |
| space group         | Ia-3d                                              | Ia-3d                                              |
| a/Å                 | 12.604                                             | 12.5057                                            |
| V/Å <sup>3</sup>    | 2002.8                                             | 1955.79                                            |
| Z                   | 8                                                  | 8                                                  |
| R <sub>wp</sub> (%) | 4.3                                                |                                                    |
| R <sub>p</sub> (%)  | 5.6                                                |                                                    |

**Table S4.** Variation of the average Hf-O bond lengths.

| Cr <sup>3+</sup> concentration (mmol) | Hf-O Bond Distances (Å) |
|---------------------------------------|-------------------------|
| 0.003                                 | 1.939                   |
| 0.004                                 | 1.942                   |
| 0.005                                 | 1.946                   |
| 0.01                                  | 1.952                   |
| 0.015                                 | 1.961                   |
| 0.02                                  | 1.970                   |
| 0.03                                  | 1.976                   |
| 0.04                                  | 1.983                   |
| 0.05                                  | 1.990                   |

**Table S5.** Energy transfer efficiencies and IQE as a function of the concentration.

| $x$   | $\eta(T)(\%)$ | IQE ( $x\text{Cr}^{3+}$ )(%) | IQE ( $0.01\text{Cr}^{3+},y\text{Yb}^{4+}$ )(%) |
|-------|---------------|------------------------------|-------------------------------------------------|
| 0.003 | 2             | 17                           | 6                                               |
| 0.004 | 6             | 18                           | 9                                               |
| 0.005 | 9             | 20                           | 11                                              |
| 0.01  | 16            | 33                           | 11                                              |
| 0.015 | 33            | 23                           | 13                                              |
| 0.02  | 36            | 24                           | 14                                              |
| 0.03  | 40            | 22                           | 14                                              |
| 0.04  | 46            | 23                           | 17                                              |
| 0.05  | 39            | 21                           | 16                                              |

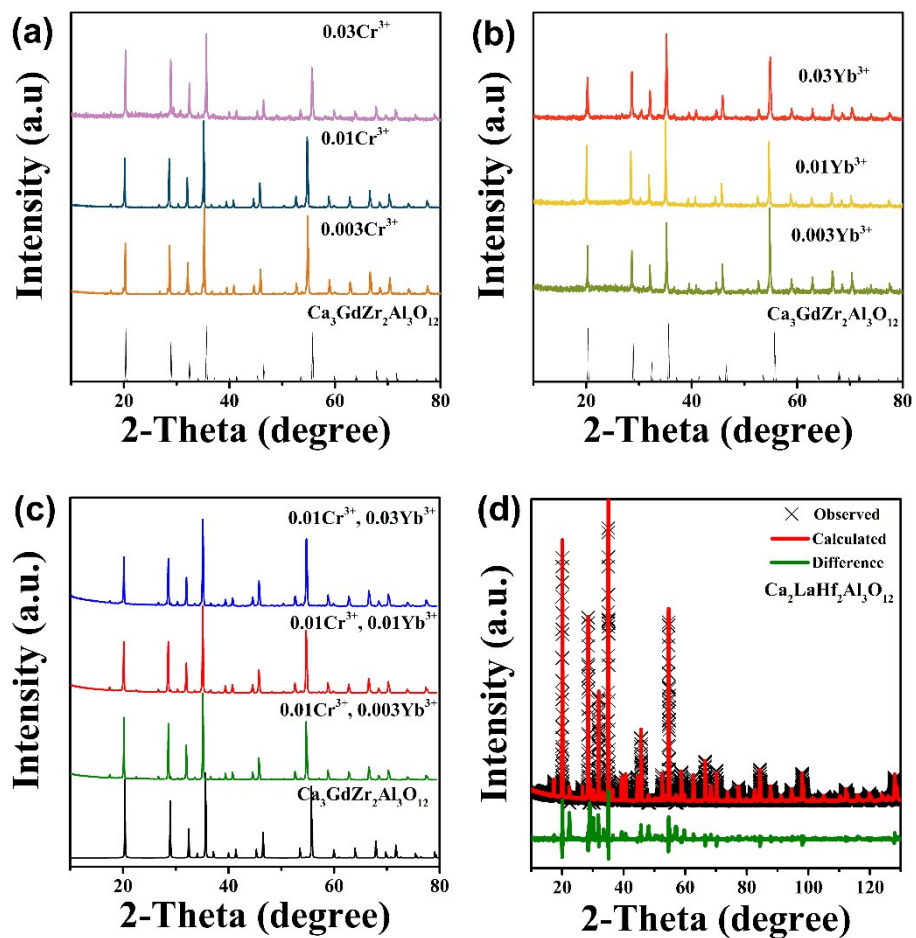

**Figure S1.** (a-c) XRD patterns of  $\text{Ca}_2\text{LaHf}_2\text{Al}_3\text{O}_{12}:x\text{Cr}^{3+}$ ,  $\text{Ca}_2\text{LaHf}_2\text{Al}_3\text{O}_{12}:y\text{Yb}^{3+}$  and  $\text{Ca}_2\text{LaHf}_2\text{Al}_3\text{O}_{12}:0.01\text{Cr}^{3+},y\text{Yb}^{3+}$ . (d) XRD Rietveld refinements of the host.

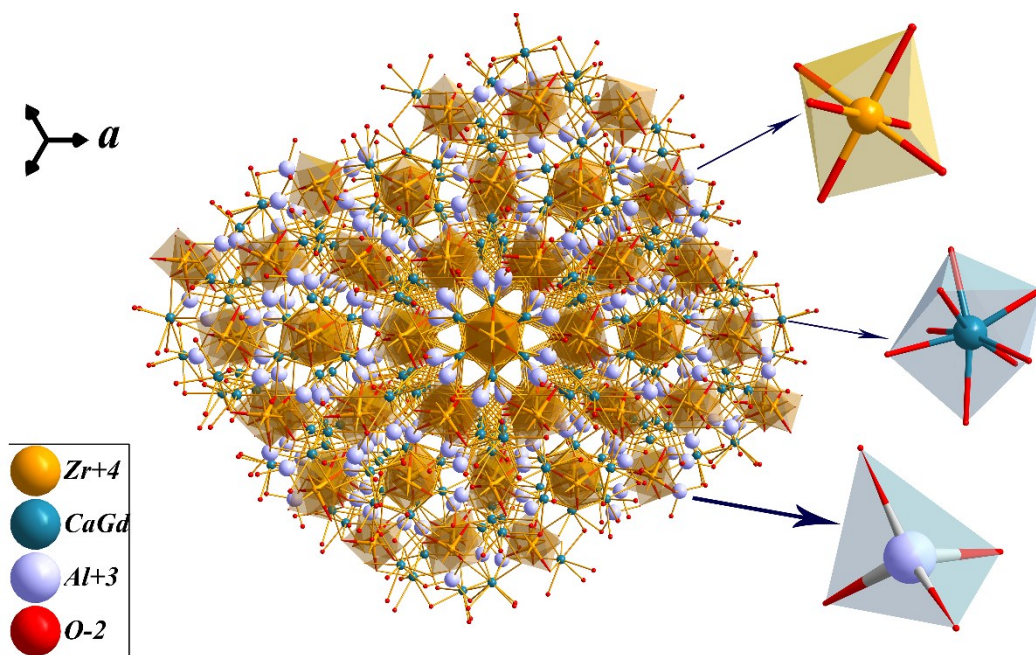

**Figure S2.** Structure diagram of  $\text{Ca}_2\text{GdZr}_2\text{Al}_3\text{O}_{12}$  compound, and coordination environment of (Al/Zr/Gd/Ca) atoms.



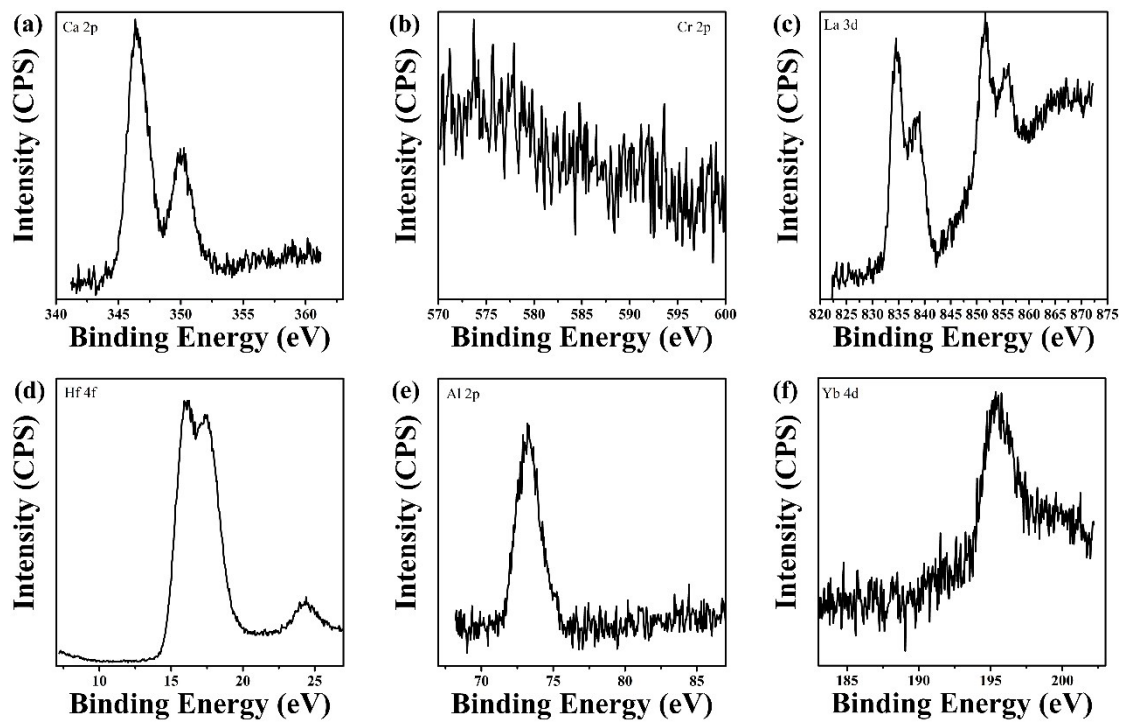

**Figure S3.** (a-f) Ca 2p, Cr 2p, La 3d, Hf 4f, Al 2p and Yb 4d XPS of  $\text{Ca}_2\text{LaHf}_2\text{Al}_3\text{O}_{12}:0.01\text{Cr}^{3+},0.01\text{Yb}^{3+}$  sample.

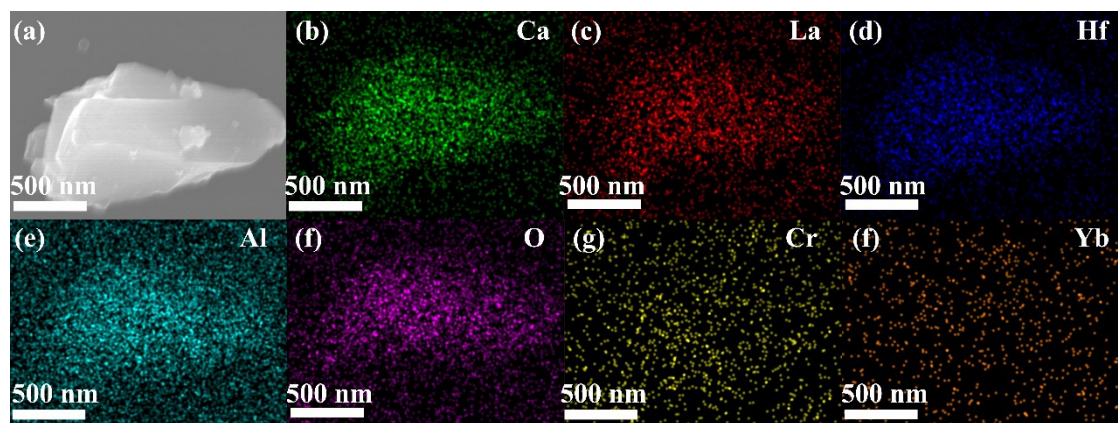

**Figure S4.** SEM image and mapping images of a  $\text{Ca}_2\text{LaHf}_2\text{Al}_3\text{O}_{12}:\text{0.01Cr}^{3+},\text{0.01Yb}^{3+}$  sample, and Ca, La, Hf, Al, O, Cr and Yb elemental mapping images of  $\text{Ca}_2\text{LaHf}_2\text{Al}_3\text{O}_{12}:\text{0.01Cr}^{3+},\text{0.01Yb}^{3+}$  sample.

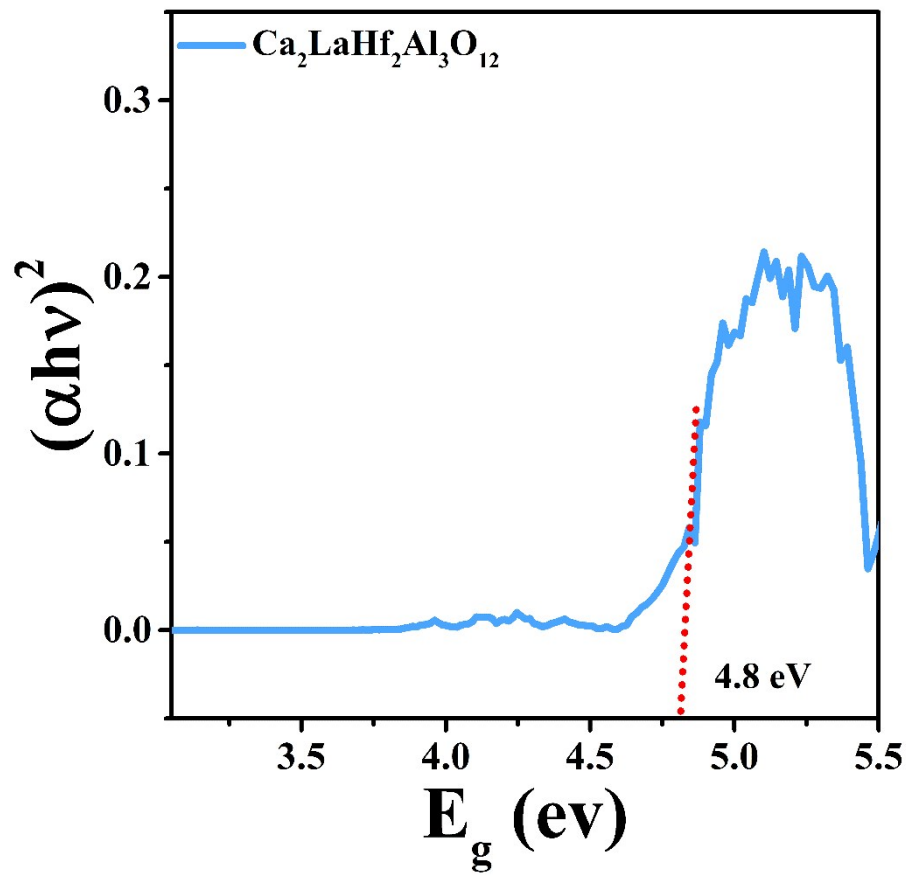

**Figure S5.** Relationship of  $(\alpha h\nu)^2$  versus photon energy  $h\nu$  in the  $\text{Ca}_2\text{LaHf}_2\text{Al}_3\text{O}_{12}$  sample.

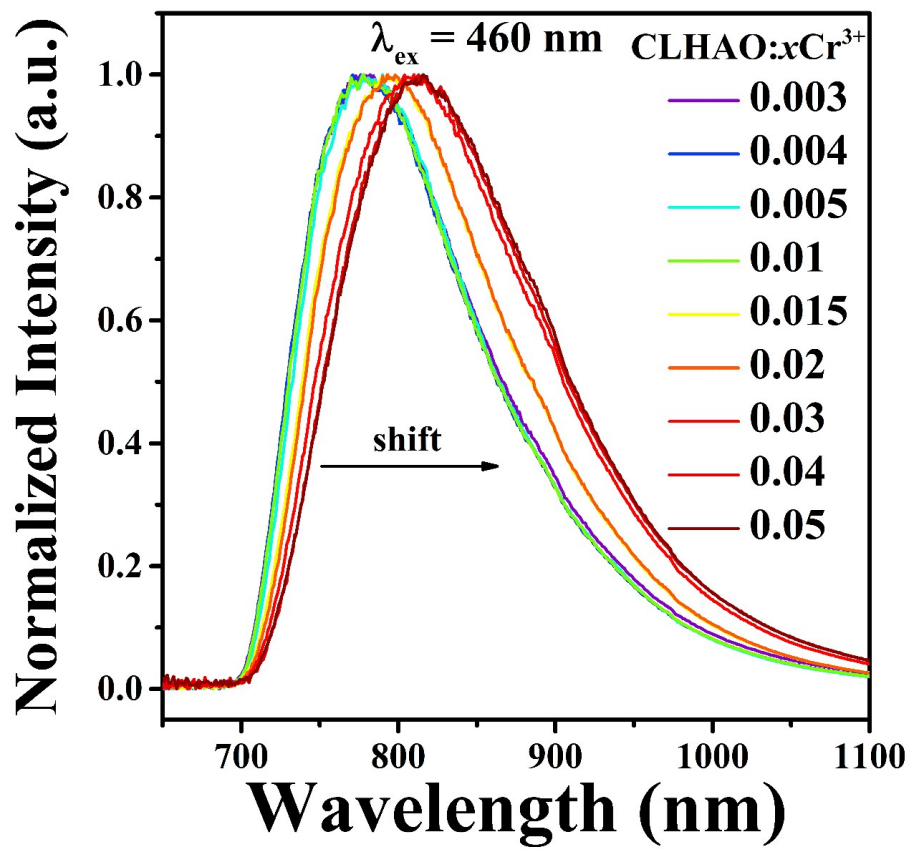

Figure S6. PL spectra of  $\text{Ca}_2\text{LaHf}_2\text{Al}_3\text{O}_{12}:x\text{Cr}^{3+}$  ( $\lambda_{\text{ex}} = 460 \text{ nm}$ ).

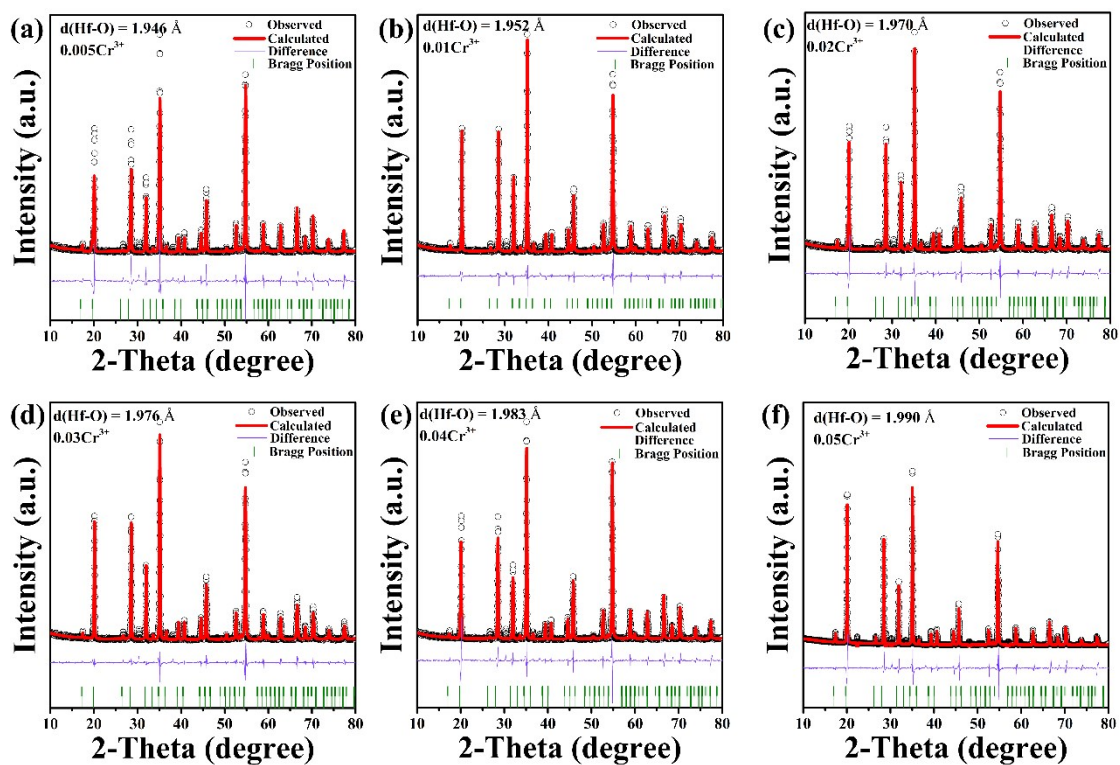

**Figure S7.** The Rietveld refinement fit of the XRD patterns of (a-f)  $\text{Ca}_2\text{LaHf}_2\text{Al}_3\text{O}_{12}:x\text{Cr}^{3+}$  by using the GSAS program.

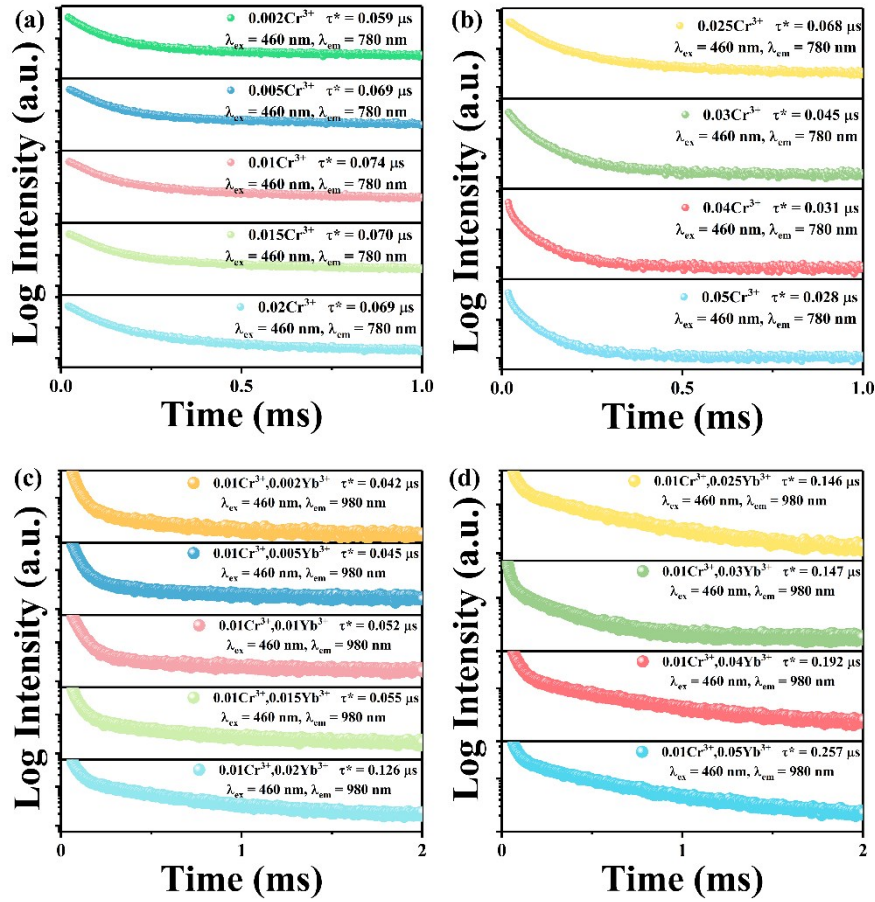

**Figure S8.** (a-b) Decay time of Cr<sup>3+</sup> in Ca<sub>2</sub>LaHf<sub>2</sub>Al<sub>3</sub>O<sub>12</sub>:xCr<sup>3+</sup> phosphors under excitation at 460 nm and monitored at 780 nm. (c-d) Decay time of Yb<sup>3+</sup> in Ca<sub>2</sub>LaHf<sub>2</sub>Al<sub>3</sub>O<sub>12</sub>:0.01Cr<sup>3+</sup>,yYb<sup>3+</sup> phosphors under excitation at 460 nm and monitored at 980 nm.

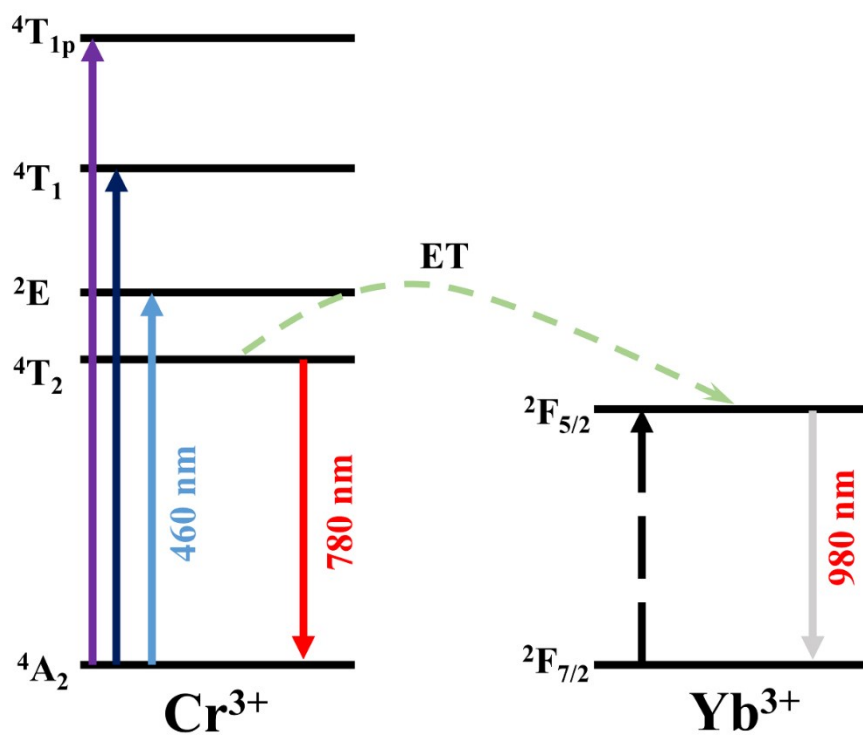

**Figure S9.** Schematic energy level diagrams of  $\text{Cr}^{3+}$  and  $\text{Yb}^{3+}$  involved ET process.

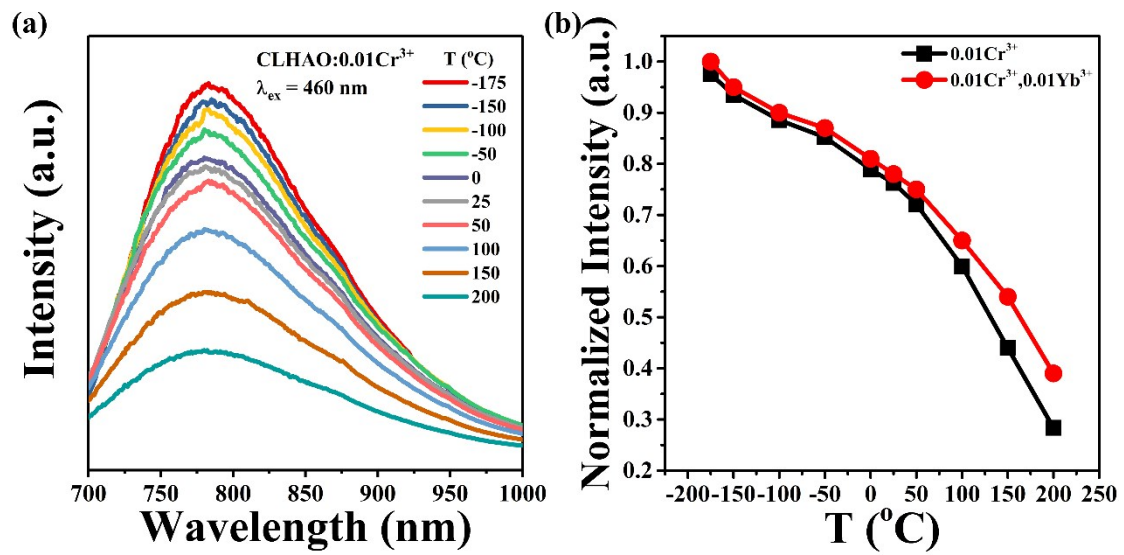

**Figure S10.** (a) Temperature-dependent PL spectra (-175~200 °C) and (b) Temperature dependence of the normalized intensity of  $\text{Ca}_2\text{LaHf}_2\text{Al}_3\text{O}_{12}:\text{0.01Cr}^{3+}$  and  $\text{Ca}_2\text{LaHf}_2\text{Al}_3\text{O}_{12}:\text{0.01Cr}^{3+},\text{0.01Yb}^{3+}$ .



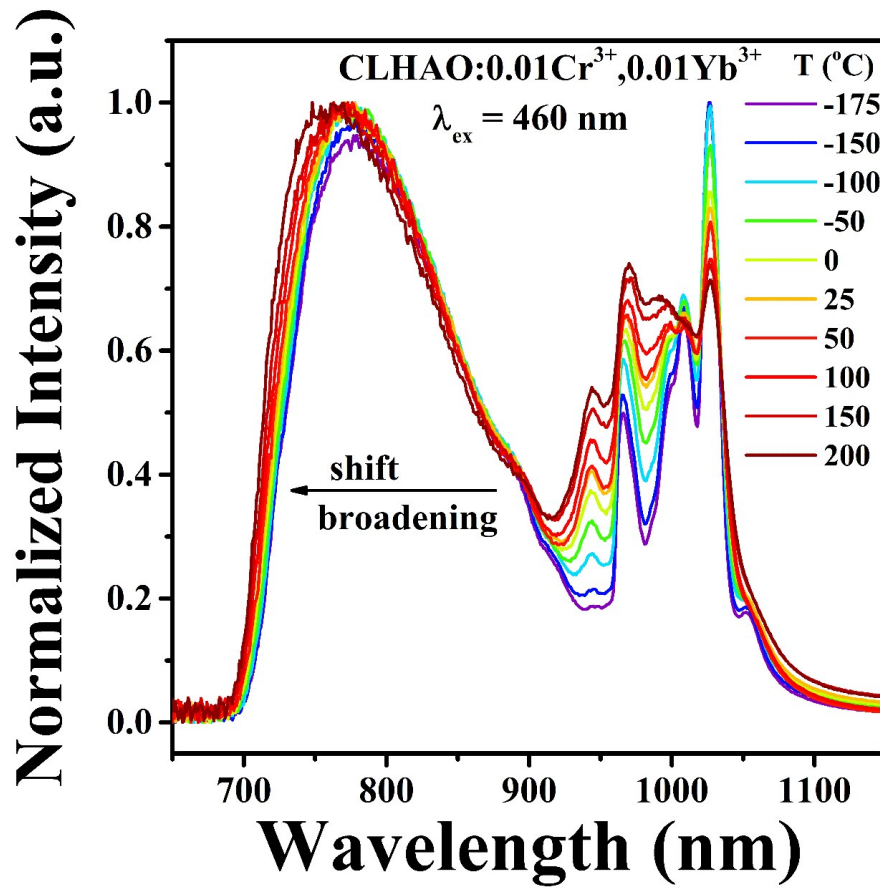

**Figure S11.** Temperature-dependent PL spectra (-175~200 °C) and normalized results of Ca<sub>2</sub>LaHf<sub>2</sub>Al<sub>3</sub>O<sub>12</sub>:0.01Cr<sup>3+</sup>,0.01Yb<sup>3+</sup>.

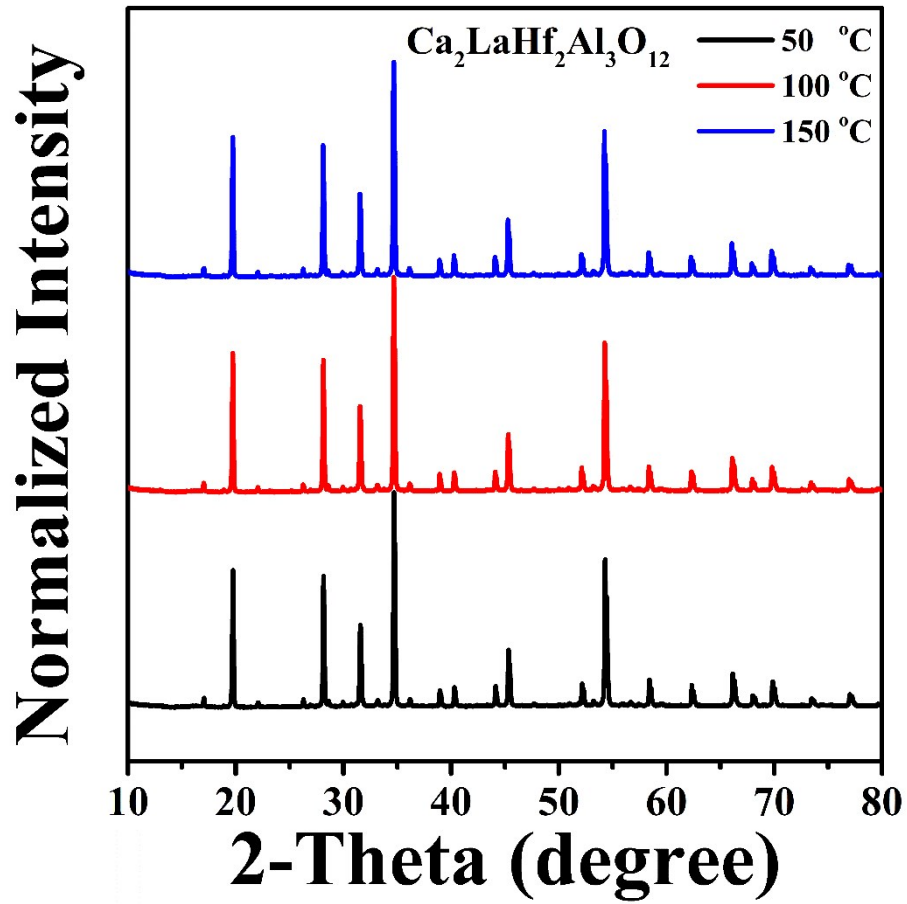

Figure S12. The dependent-temperature XRD patterns of  $\text{Ca}_2\text{LaHf}_2\text{Al}_3\text{O}_{12}$  sample.

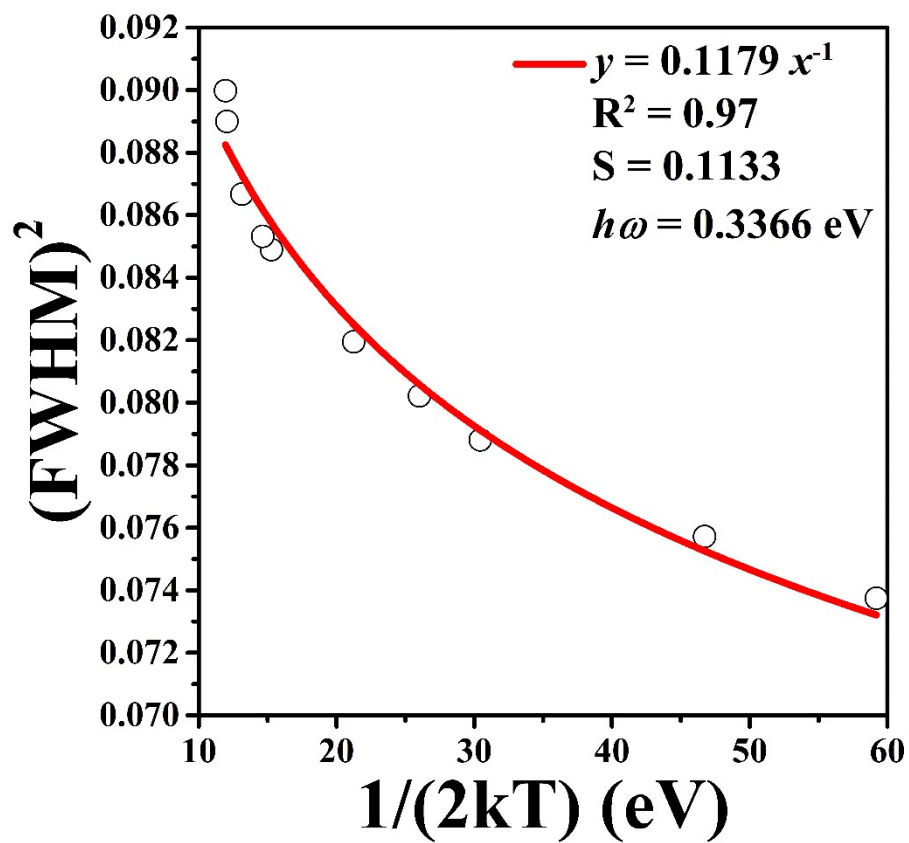

**Figure S13.** Fitting results of square of full width at half maximum ( $FWHM^2$ ) as a function of  $1/2kT$ .

The diffraction points in the red circle in SAED image correspond to the main diffraction lattice planes (0 2 4) and (2 3 3) of the  $\text{Ca}_2\text{LaHf}_2\text{Al}_3\text{O}_{12}$  lattice, respectively, by selecting the largest diffraction point as the diffraction center. The planes (0 2 4) and (2 3 3) in a hexagonal system can be calculated by theoretical function.<sup>[1]</sup> The distance between adjacent crystal fringes is measured in crystal planes (0 2 4) and (2 3 3), and the d-spacing values are 0.2759 and 0.263 nm, respectively. The angle between the two crystal planes can be calculated by the following correlation function:

$$\cos\varphi = \frac{\frac{h_1 h_2}{a^2} + \frac{k_1 k_2}{b^2} + \frac{l_1 l_2}{c^2}}{\sqrt{\left(\frac{h_1^2}{a^2} + \frac{k_1^2}{b^2} + \frac{l_1^2}{c^2}\right)\left(\frac{h_2^2}{a^2} + \frac{k_2^2}{b^2} + \frac{l_2^2}{c^2}\right)}} \quad (1)$$

$a = b = c = 12.34$  represent the crystal lattice parameters of  $\text{Ca}_2\text{LaHf}_2\text{Al}_3\text{O}_{12}$ .  $h$ ,  $k$  and  $l$  are indices of crystal planes (0 2 4) and (2 3 3), respectively. The crystal planes angle is  $31^\circ$  between (0 2 4) and (2 3 3) planes.

Its value is estimated through fitting the temperature-dependent full width at FWHM of emission peaks:<sup>[2, 3]</sup>

$$FWHM = 2.36\sqrt{S}\psi\omega\sqrt{\coth\left(\frac{\psi\omega}{2kT}\right)} \quad (2)$$

In which  $k$  is the Boltzmann constant,  $\omega$  is the phonon frequency, and

$$\coth(x) = \frac{e^x + e^{-x}}{e^x - e^{-x}}$$

It can be converted to

$$FWHM^2 = 5.57 \times S \times (\psi\omega)^2 \left( 1 + \frac{1}{e^{\frac{\psi\omega}{kT}} - 1} \right) \quad (3)$$

According to  $\frac{\psi\omega}{kT} \approx 10^{-3}$

Formula (3) is transformed into

$$FWHM^2 = 5.57 \times S \times (\psi\omega)^2 \left( 1 + \frac{1}{\frac{\psi\omega}{2kT}} \right) \quad (4)$$

Approximately equal to 
$$FWHM^2 = a + \frac{b}{\frac{I}{2kT}} \quad (5)$$

Where  $a = 5.57 \times S \times (\psi\omega)^2$  and  $b = 5.57 \times S \times (\psi\omega)$ .

## References

- 1 E. Hitzer, *Math. Meth. Appl. Sci.*, 2011, **34**, 1421-1429.
- 2 K. M. Mccall, C. C. Stoumpos, S. S. Kostina, M. G. Kanatzidis, B. W. Wessels, *Chem. Mater.*, 2017, **29**, 4129-4145.
- 3 J. J. Luo, X. M. Wang, S. R. Li, J. Liu, Y. M. Guo, G. D. Niu, L. Yao, Y. H. Fu, L. Gao, Q. S. Dong, C. Y. Zhao, M. Y. Leng, F. S. Ma, W. X. Liang, L. D. Wang, S. Y. Jin, J. B. Han, L. J. Zhang, J. Etheridge, J. B. Wang, Y. F. Yan, E. H. Sargent, J. Tang, *Nature*, 2018, **563**, 541-545.
